# Supplementary material for: The efficacy of aerosol-cloud-radiative perturbations from near-surface emissions in deep open-cell stratocumulus
Source: Copernicus journal article supplement (doi:10.5194/acp-2018-708), 2018-07-30
Supplement: Supplementary file [file acp-2018-708-AC2-supplement.pdf]

**Authors response to: “Interactive comment on “The efficacy of aerosol-cloud-radiative perturbations from near-surface emissions in deep open-cell stratocumulus” by Anna Possner et al.**

Anonymous Referee #2

Received and published: 18 September 2018

General comments: Possner et al present an interesting modeling study in which the effect of ship emissions on cloud microphysical and macrophysical properties of deep open cells is examined. Based on field campaign measurements, and previous modeling study of Wang et al 2010, Possner et al. show that despite the lack of typical linear ship tracks, the cloud adjustments can be significantly larger than one would expect. The manuscript is well written and the analysis support the authors conclusions. I recommend the manuscript to be published after minor revisions.

We thank the reviewer for the evaluation and have addressed all comments in the revised manuscript. Individual responses to each of the issues raised are inserted below.

Specific comments: 1. The authors cite that 70% of marine Sc form in deep boundary layers (p16119; citation needed, e.g., Muhlbauer et al., 2014). Do the 70% compose mainly open cells? How much of the 70% are closed cells? This needs to be mentioned in order to asses the global effect of ship emissions in deep open cells.

From Table 4 of Muhlbauer et al. (2014) we know that open-cell and disorganised stratocumulus clouds occur far more often than the closed-cell regime. A further height-dependent split of the frequency of occurrence in open, closed and disorganised stratocumuli was not obtained by Muhlbauer et al. (2014) and is not available to us. While the authors agree that this would be needed for a global assessment of the radiative impact of ship emissions, it is beyond the scope of this study, which focuses on the feedback mechanisms in such regimes and explores the potential for radiative impacts that were previously unexplored and unquantified.

The issue of relative regime occurrence was previously only mentioned in the introduction of the submitted manuscript (P2L26ff):

“Yet, over 70% of stratocumulus clouds are found in deeper boundary layers (Muhlbauer et al., 2014). The potential for albedo changes is particularly high in the open-cell, and disorganised stratocumulus regimes, which occur more frequently in the sub-tropics than in the closed cells regime (Muhlbauer et al., 2014).” A more quantitative statement has now also been added to the conclusions (including the reference to Muhlbauer et al., 2014).

2. The domain mean increase in albedo is function of the domain size. For a smaller domain, the increase would be larger, and for larger domain size, smaller. Therefore, domain mean increase in albedo of 0.05 is somewhat arbitrary. If the authors can estimate the density of ship tracks in a given regions with frequently observed deep open cells, a more meaningful value of regional mean increase in albedo can be estimated.

It should be noted that the initial design of the emission flux in Wang et al (2011) was taken in relation to the suggested flux of sea salt for potential marine brightening applications. The sea salt emission flux chosen is indeed proportional to the domain size. The realization or injection strategy does matter, as discussed in by Wang et al. (2011). To address the relevance of the emission strategy with respect to ship traffic the following paragraph was added to the manuscript at P14L20: Furthermore, while these simulations are highly idealised in their setup, they do not necessarily reflect unrealistic emission conditions. The prescribed ship is assumed to travel periodically along an identical emission line without any crosswind, which may alter the plume size or dilute

emissions more effectively. Within the 48 h simulation, a total of 5 ships traverse the  $180 \times 180 \text{ km}^2$  domain repeatedly at a constant sailing speed of  $5 \text{ ms}^{-1}$ , and the cloud response to their combined emissions is assessed. Throughout most of the North Pacific a shipping density of around 30 ships per  $100 \text{ km}^2$  per year is observed (MarineTraffic, 2018). Assuming a speed of  $5 \text{ ms}^{-1}$  (or even  $10 \text{ ms}^{-1}$ ), such a density corresponds to an estimated number of 116 (58) ships within the simulation domain on average. Within the North Atlantic, the higher density of ships could even correspond to over 400 (200) ships within a  $180 \times 180 \text{ km}^2$  domain (MarineTraffic, 2018). Therefore, our emission scenario is equivalent to merely 1 – 9% of these ships contributing to increased CCN concentrations within the seeded domain.

Furthermore, to clearly highlight that the brightening occurred throughout the domain (though most brightening remained constrained to the seeded domain). The following figure (Fig. S6) was added to the appendix and referenced on P11L16:

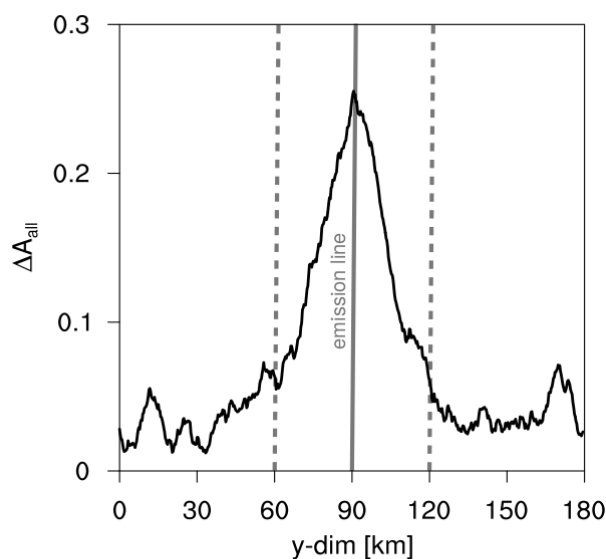

**Figure 6.** Across-track difference in all-sky albedo ( $A_{all}$ ) between the *ship* and *ctrl* simulation averaged over the last 24 h of both simulations. Solid grey line denotes the location of the emission line of the ship, while grey dashed lines mark the seeded domain ( $\pm 30 \text{ km}$  from emission line).

3. The authors claim in the abstract that changes in cloud-radiative properties are masked by the natural variability. What is the meaning of natural variability in this context?

For clarification we rephrased “natural variability” with “naturally occurring variability” (i.e., the variability occurring within the cloud field without an anthropogenic aerosol perturbation).

The abstract further says that the above can be overcome by utilizing the spatio-temporal distribution of the aerosol perturbation. However, in Figure 3 the aerosol plume can be easily seen in Nd, which serves as a tracer to where one can expect cloud adjustment. This can be used in observational studies.

In Figure 3 only small parts of the entire seeded domain are characterised by perturbations in cloud-top Nd of  $100 \text{ cm}^{-3}$  or above. Throughout most of the seeded domain, where CCN concentrations are increased by a factor 2, or even in regions where the CCN concentrations exceed  $100 \text{ cm}^{-3}$ , Nd is well within the background variability. Furthermore, the higher concentrations of  $\text{Nd} \sim 100 \text{ cm}^{-3}$  are neither unrealistically high for a naturally occurring background, nor spatially coherent to be picked up as an unambiguous marker of an anthropogenic perturbation. Finally, if one were to use only sub-regions where Nd is increased, one would likely miss the full radiative response simulated here

for open cells, where the predominant forcing is due to an increase in cloud cover of the cloud filaments with a low Nd. For these reasons the authors decide to keep the statement that our simulations indicate that the spatio-temporal distribution of the aerosol is needed to determine the full extent of the cloud-radiative impact by the ship emissions in this regime.

4. The authors should improve the description of the tables: Table 1: The caption says the simulated values are domain mean. These values are compared with RF06, which seems to be in-clouds values (for LWP at least). Clarification is needed. Table2: The left column is unclear. What is the difference between ship, ship-seeded and ship-unseeded? (ship-unseeded is not mentioned anywhere else in the text). Under the CF column, how CF can be not 100% inside walls? given that walls are defined by ascending air? Is the wall CF is the fraction of walls out of the total CF/domain? If so it means that there is also a dynamical adjustment.

We agree with the reviewer that the captions provided insufficient information. Both captions have been revised and the LHS column of Table 2 is now renamed in the revised manuscript.

5. I recommend to elaborate more in the introduction on previous studies that attempted to quantify the regional effect of ship tracks (e.g., Schrier et al. 2006, 2007, Peters et al. 2011).

Missing references have been added to the manuscript.

6. The simulation assumes an idealized case with no perpendicular winds. I assume that most ship tracks don't have head/tail winds, rather side winds. Would the wind direction relative to the emission source increase/decrease the regional area that is affected by the emissions? This should be discussed.

Yes, the model domain was purposely aligned with the wind direction in order to identify a potential linear structure of ship tracks and compare with the previous study (Wang et al., 2011) for a shallow boundary layer. This is incorporated into the new paragraph included in the revised manuscript, which is presented under comment #2.

Technical corrections: Section 2.2: What was the duration of the simulations?

P4L20: Both simulations were run for 48 hours.

P816: Remove "and".

"A comma was introduced to clarify the sentence."

P8115: Any statistical tests were done to determine the 30km band around the emission line? It is mentioned that inside this region  $N_a$  are elevated, but by how much? I also would expect the plume to expand and dilute as it gets more mature, and not being fixed.

The seeded domain was conservatively identified as the corridor, where CCN concentrations were increased and the meandering plume, consisting of the super-position of 5 consecutive ships, remained within the bounds of this region. We agree that for an individual ship one would expect a widening of the plume with distance. In previous analyses performed for this study we have quantified the core plume in these simulations where  $N_a$  was outside 3 standard deviations of the background concentration, but this constrained the analysis to a rather narrow region of highest concentration around the emission line. No further insight was obtained from these results and they were therefore omitted in the manuscript. We therefore felt that it was more insightful to distinguish in the analysis between a region where CCN concentrations were elevated and a region where no increase in CCN was detected.

P1217-10: This paragraph is not clear.

The paragraph has been rephrased for clarity.

P12128: Observational studies showed ship tracks closing open cells (e.g., Goren and Rosenfeld 2012 where at least part of the open cells seems to be deep, based on the cells spatial scale;

Christensen and Stephens 2012). While simulations does not show a reverse transition, observational evidences should be provided as well.

The “large open cells” in Goren & Rosenfeld (2012) are estimated to be around 20-25 km, which is roughly half the size of the cells simulated here. Furthermore, observational evidence (Durkee et al 2000b, Toll et al 2017, Chen et al 2015, Christensen & Stephens 2012) suggests that ship tracks in boundary layers deeper than 1 km are extremely unlikely. Therefore, it is not surprising to see no track-like structure in these simulations. However, it seems that a similar process occurs in deep boundary layers, where large open cells are partially filled in, but the filaments never stretch across the entire cell, which would then allow it to recover (given sufficient mixing generated through cloud-top cooling to overcome sub-cloud stability). The Goren and Rosenfeld (2012) reference was added to the manuscript (P12L33).

P16117: Consider changing “such tracks” to “linear shaped tracks”, and to add that they are rare in deep boundary layers in comparison to shallow boundary layers (reference is needed).

Rephrasing has been done and references from the introduction are repeated here.

P16128-29: How do the fractional percentage calculated? From which table?

The paragraph was rephrased slightly such that now all numerical results are merely summarised here without reference, but are referenced to corresponding figures and tables in section 3.

P16126 the → the.

Done.

P16127 annular → annual.

Done.

Figure 5: In the caption the boundary layer depth for each of the simulations should be provided (i.e., shallower in Wang et al 2011).

The information was added.

Figure 6: In order to cover also the night time in Figure 6d, consider replacing (or adding) cloud optical thickness with cloud albedo?

As only day-time values in  $A_{\text{all}}$  and  $A_{\text{cld}}$  are considered throughout the paper, the night-time values are not shown here for consistency. Although they are diagnosed, we omitted them in the averaging process, as they have no physical meaning but affect the temporal mean due to the diurnal cycle (clouds are optically thicker at night).

Supplementary: Caption 3: What is “ship\_open”?

This typo has been removed.

Caption 6: remove “and” in line 3. Caption is not clear. X axis label is not consistent.

This has been changed.
